# Supplementary material
Source: MDPI journal article supplement (https://www.mdpi.com/2073-4352/10/5/348)
Supplement: s1 [file s1]

## Supplementary Materials:

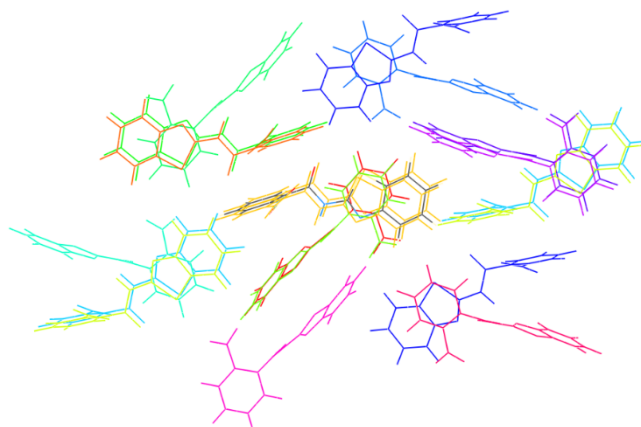

|  | N | Symop                 | R     | Electron Density | E_ele | E_pol | E_dis | E_rep | E_tot |
|--|---|-----------------------|-------|------------------|-------|-------|-------|-------|-------|
|  | 1 | -                     | 3.70  | B3LYP/6-31G(d,p) | -80.6 | -18.6 | -86.6 | 123.7 | -97.9 |
|  | 1 | -x, -y, -z            | 9.71  | B3LYP/6-31G(d,p) | -16.7 | -3.8  | -17.2 | 13.4  | -27.2 |
|  | 2 | x, y, z               | 7.61  | B3LYP/6-31G(d,p) | -8.4  | -2.3  | -10.7 | 13.1  | -11.8 |
|  | 2 | -x+1/2, y+1/2, -z+1/2 | 12.59 | B3LYP/6-31G(d,p) | -3.4  | -1.2  | -11.8 | 7.9   | -9.9  |
|  | 1 | -                     | 5.63  | B3LYP/6-31G(d,p) | -14.0 | -4.8  | -44.7 | 25.5  | -41.5 |
|  | 1 | -x, -y, -z            | 6.95  | B3LYP/6-31G(d,p) | -18.0 | -6.2  | -42.1 | 26.0  | -44.2 |
|  | 1 | -                     | 8.60  | B3LYP/6-31G(d,p) | 5.8   | -1.4  | -8.8  | 2.7   | -0.9  |
|  | 1 | -                     | 12.70 | B3LYP/6-31G(d,p) | -2.3  | -1.4  | -6.9  | 3.2   | -7.5  |
|  | 2 | -x+1/2, y+1/2, -z+1/2 | 12.90 | B3LYP/6-31G(d,p) | -5.4  | -1.4  | -10.2 | 10.4  | -9.2  |
|  | 1 | -                     | 8.82  | B3LYP/6-31G(d,p) | -7.1  | -2.1  | -9.6  | 11.3  | -10.4 |
|  | 2 | x+1/2, -y+1/2, z+1/2  | 10.45 | B3LYP/6-31G(d,p) | -3.7  | -1.2  | -6.2  | 3.5   | -8.0  |
|  | 1 | -                     | 11.31 | B3LYP/6-31G(d,p) | -0.7  | -0.3  | -11.6 | 6.3   | -7.2  |
|  | 1 | -                     | 12.65 | B3LYP/6-31G(d,p) | 0.3   | -0.1  | -5.8  | 2.5   | -3.3  |
|  | 1 | -                     | 8.79  | B3LYP/6-31G(d,p) | -5.5  | -1.2  | -10.2 | 6.5   | -11.6 |
|  | 1 | -                     | 12.29 | B3LYP/6-31G(d,p) | -1.9  | -0.6  | -5.9  | 1.8   | -6.5  |

**Figure S1.** Interaction energies for a 3.8 Å cluster around IA.

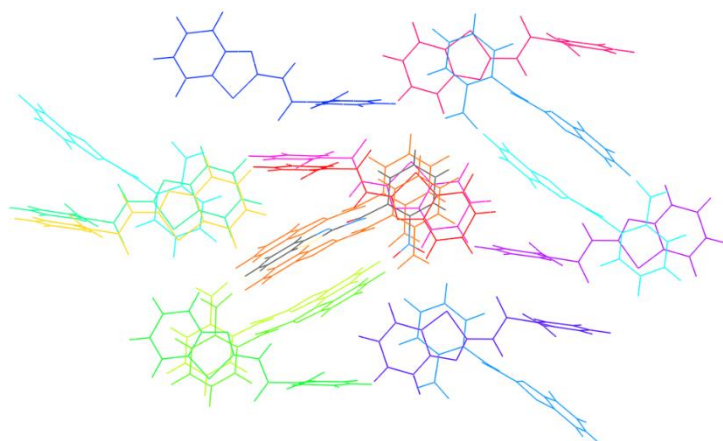

|  | N | Symop                 | R     | Electron Density | E_ele | E_pol | E_dis | E_rep | E_tot |
|--|---|-----------------------|-------|------------------|-------|-------|-------|-------|-------|
|  | 1 | -                     | 3.70  | B3LYP/6-31G(d,p) | -80.6 | -18.6 | -86.6 | 123.7 | -97.9 |
|  | 2 | x, y, z               | 7.61  | B3LYP/6-31G(d,p) | 3.4   | -1.7  | -10.8 | 6.6   | -3.0  |
|  | 1 | -                     | 12.65 | B3LYP/6-31G(d,p) | 0.3   | -0.1  | -5.8  | 2.5   | -3.3  |
|  | 1 | -x, -y, -z            | 6.52  | B3LYP/6-31G(d,p) | -9.3  | -3.0  | -24.5 | 24.3  | -18.4 |
|  | 1 | -x, -y, -z            | 7.81  | B3LYP/6-31G(d,p) | -10.4 | -2.1  | -56.8 | 45.9  | -33.6 |
|  | 1 | -                     | 8.79  | B3LYP/6-31G(d,p) | -5.5  | -1.2  | -10.2 | 6.5   | -11.6 |
|  | 1 | -                     | 11.31 | B3LYP/6-31G(d,p) | -0.7  | -0.3  | -11.6 | 6.3   | -7.2  |
|  | 2 | -x+1/2, y+1/2, -z+1/2 | 12.17 | B3LYP/6-31G(d,p) | -5.1  | -1.4  | -10.0 | 12.7  | -7.2  |
|  | 2 | x+1/2, -y+1/2, z+1/2  | 11.40 | B3LYP/6-31G(d,p) | -7.1  | -1.2  | -4.0  | 2.8   | -10.1 |
|  | 1 | -                     | 8.60  | B3LYP/6-31G(d,p) | 5.8   | -1.4  | -8.8  | 2.7   | -0.9  |
|  | 1 | -                     | 8.82  | B3LYP/6-31G(d,p) | -7.1  | -2.1  | -9.6  | 11.3  | -10.4 |
|  | 1 | -                     | 12.70 | B3LYP/6-31G(d,p) | -2.3  | -1.4  | -6.9  | 3.2   | -7.5  |
|  | 1 | -                     | 5.63  | B3LYP/6-31G(d,p) | -14.0 | -4.8  | -44.7 | 25.5  | -41.5 |
|  | 1 | -                     | 12.29 | B3LYP/6-31G(d,p) | -1.9  | -0.6  | -5.9  | 1.8   | -6.5  |

**Figure S2.** Interaction energies for a 3.8 Å cluster around IB.

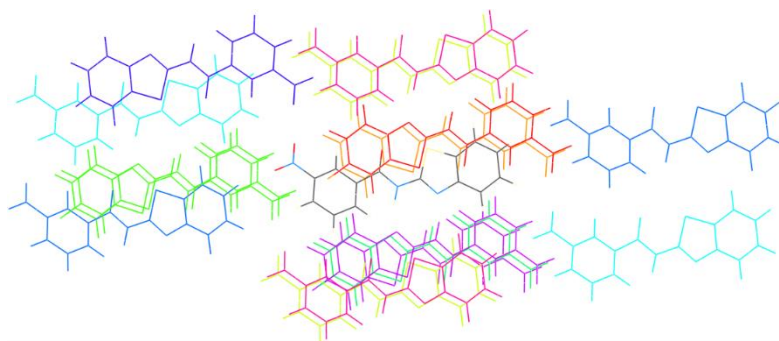

|  | N | Symop                 | R     | Electron Density | E_ele | E_pol | E_dis | E_rep | E_tot |
|--|---|-----------------------|-------|------------------|-------|-------|-------|-------|-------|
|  | 1 | -x, -y, -z            | 6.17  | B3LYP/6-31G(d,p) | -14.4 | -3.0  | -65.4 | 59.7  | -37.5 |
|  | 1 | -x, -y, -z            | 4.40  | B3LYP/6-31G(d,p) | -14.8 | -3.9  | -83.9 | 68.6  | -49.3 |
|  | 2 | x, -y, z+1/2          | 6.72  | B3LYP/6-31G(d,p) | -13.9 | -3.7  | -18.3 | 21.4  | -20.2 |
|  | 2 | -x+1/2, y+1/2, -z+1/2 | 12.12 | B3LYP/6-31G(d,p) | -13.1 | -2.0  | -12.4 | 8.7   | -20.7 |
|  | 1 | -x, y, -z+1/2         | 5.48  | B3LYP/6-31G(d,p) | -97.4 | -26.6 | -50.7 | 126.1 | -88.9 |
|  | 2 | x+1/2, y+1/2, z       | 15.11 | B3LYP/6-31G(d,p) | -5.1  | -1.3  | -5.4  | 6.2   | -7.2  |
|  | 2 | x+1/2, -y+1/2, z+1/2  | 15.25 | B3LYP/6-31G(d,p) | -3.7  | -0.8  | -5.0  | 6.7   | -4.8  |
|  | 1 | -x+1/2, -y+1/2, -z    | 12.01 | B3LYP/6-31G(d,p) | 2.4   | -0.4  | -1.7  | 0.1   | 0.7   |
|  | 2 | -x, y, -z+1/2         | 9.04  | B3LYP/6-31G(d,p) | -3.0  | -0.9  | -8.0  | 3.4   | -8.7  |
|  | 2 | x, -y, z+1/2          | 7.99  | B3LYP/6-31G(d,p) | -1.9  | -0.4  | -9.4  | 4.4   | -7.7  |

**Figure S3.** Interaction energies for a 3.8 Å cluster around II.
